# Supplementary material
Source: PubMed Central journal article supplement (PMC3323048)

## Supplementary Data (Figures and Legends)

### Supplemental Figure 1

mCIITA protein, and not wtCIITA protein, can be co-precipitated (Co-IP) with endogenous Nod2. Western blotting (WB) was performed using either anti-CIITA-C-terminus or anti-Nod1 antibodies (indicated as WB:CIITA and WB:Nod1) after the immune complex was immunoprecipitated by Nod2 antibody (IP:Nod2). Whole cell lysates (input) and irrelevant IgG were used as positive and negative controls, respectively.

### Supplemental Figure 2

Western blotting shows that the mCIITA protein (90 kD) is over-expressed in splenocytes of the mCIITA-transgenic mouse. The antibody we used in Western blotting is against the C-terminus of the CIITA molecule: both mCIITA (90 kD) and wtCIITA (120 kD) can be blotted out using this antibody. The appearance of a 90 kD band indicated a successful over-expression in the mCIITA-transgenic mouse.

### Supplemental Figure 1

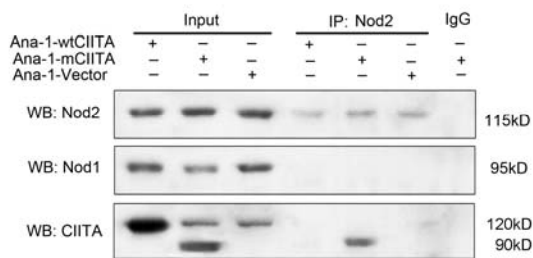

### Supplemental Figure 2

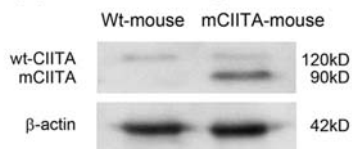

Supplement: supp_M111.288498_Supplement_data.pdf [file supp_M111.288498_Supplement_data.pdf]
